# Supplementary material for: Memory Self-Efficacy Beliefs Modulate Brain Activity when Encoding Real-World Future Intentions
Source: PLOS journal article supplement (doi:10.1371/journal.pone.0073850), 2013-09-03
Supplement: S1 (10.1371/journal.pone.0073850.s001) [file journal.pone.0073850.s001]

## Supporting Information: Results

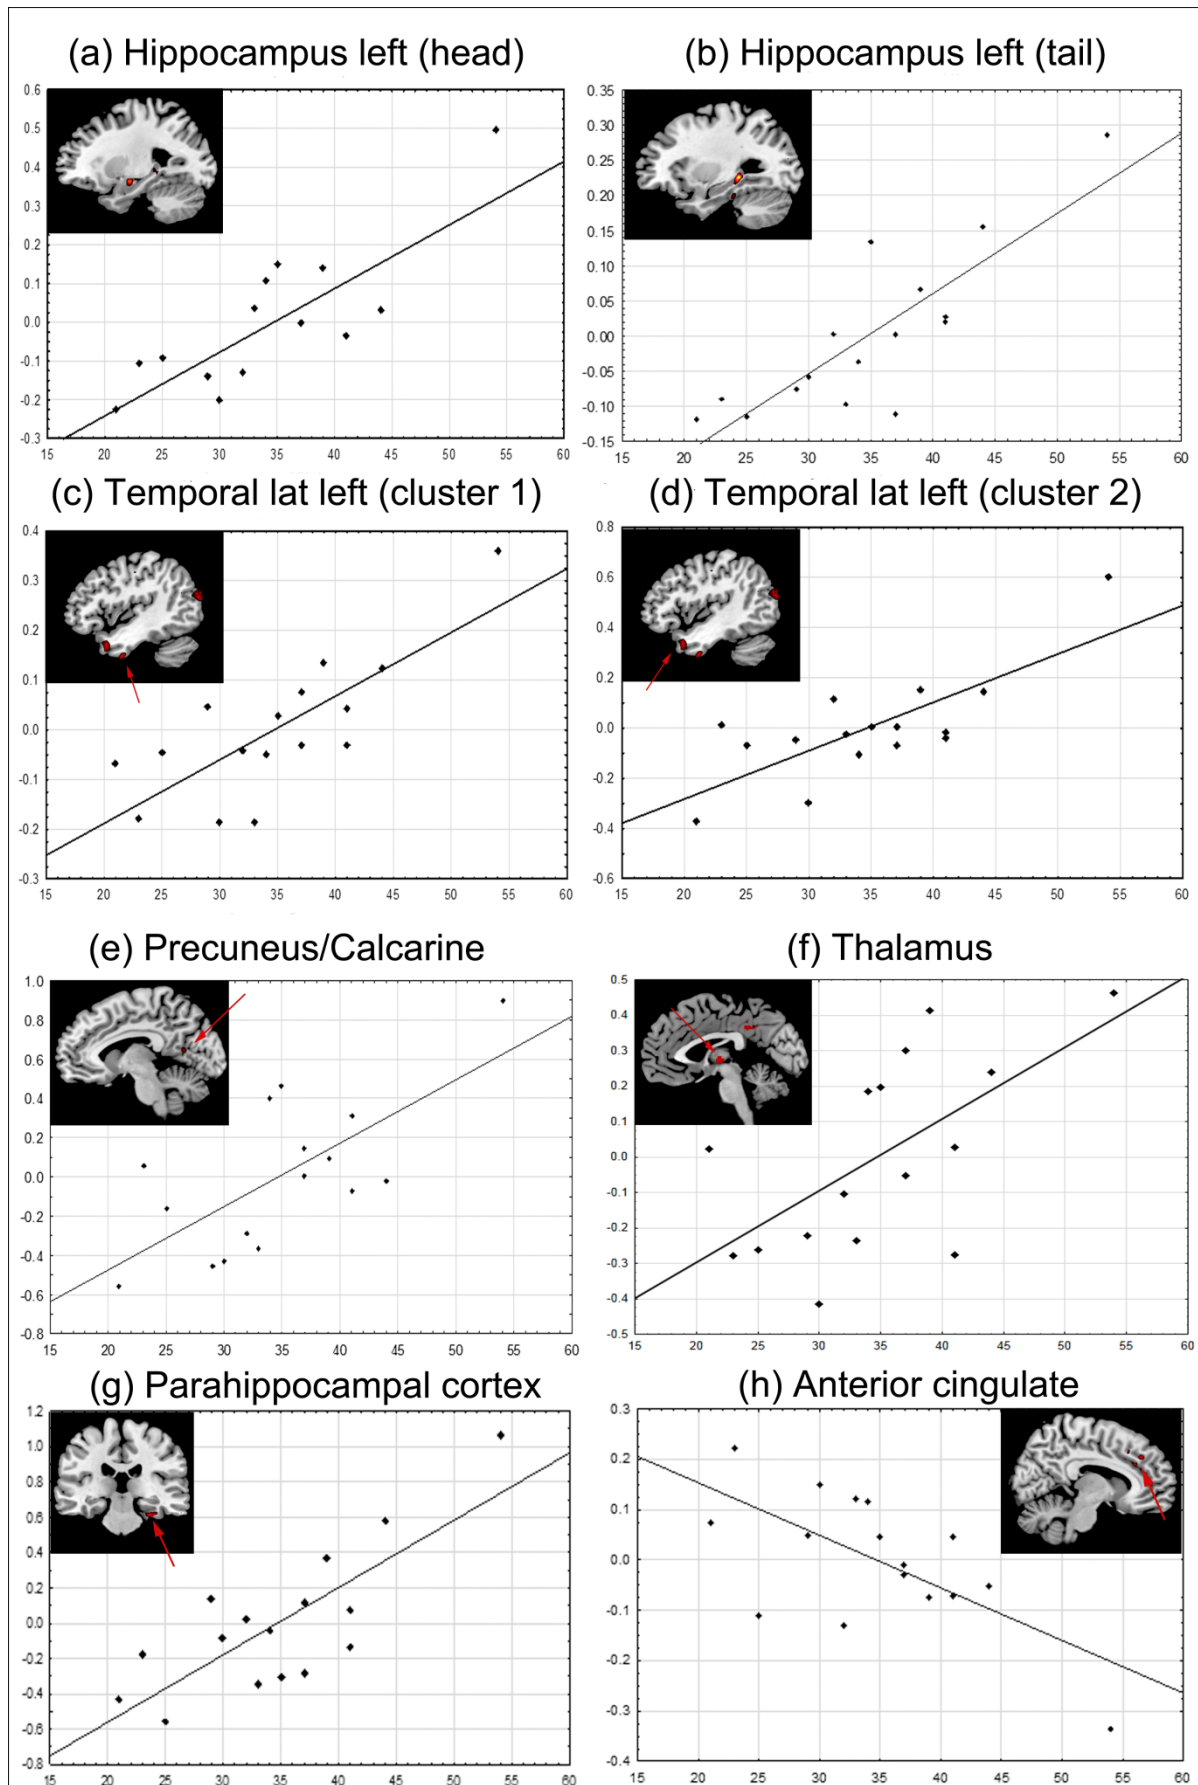

Correlations between PRMQ scores (X-axis) and [Encoding – Control] activity (adjusted beta values at the peaks, Y-axis) in the whole sample. (a) Left hippocampus (head, peak coordinates [-26;-10;-12]) with  $t$ -value = 6.11; plot without controlling for sex ( $r = 0.79$ ,  $p < 0.001$ ;  $r$  after controlling for sex = 0.86,  $p$  one-tailed  $< 0.001$ ). (b) Tail of the left hippocampus [-30;-36;-4]  $t = 7.88$ ; plot without controlling for sex ( $r = 0.83$ ,  $p < 0.001$ ;  $r$  after controlling for sex = 0.91,  $p < 0.001$ ). In the correlation analysis, the effect in the right hippocampal tail was smaller ( $r = 0.58$ ,  $p = 0.01$ ;  $r$  after controlling for sex = 0.63,  $p = 0.005$ ). (c, d) There were 2 clusters in the left lateral temporal cortex. (c) [-46;-4;-40]  $t = 5.59$ ; (d) [-44;14;-30]  $t = 5.39$ ; plot without controlling for sex for (c) ( $r = 0.77$ ,  $p < 0.001$ ;  $r$  after controlling for sex = 0.84,  $p < 0.001$ ), and (d)  $r = 0.76$ ,  $p < 0.001$  ( $r$  after controlling for sex = 0.83,  $p < 0.001$ ). (e) Calcarine/precuneus [-8;-60;12]  $t = 4.18$ ; plot without controlling for sex ( $r = 0.70$ ,  $p = 0.002$ ;  $r$  after controlling for sex = 0.76,  $p < 0.001$ ). (f) Thalamus [-2;-12;2]  $t = 3.29$ ; plot without controlling for sex ( $r = 0.62$ ,  $p = 0.005$ ;  $r$  after controlling for sex = 0.67,  $p = 0.003$ ). (g) In the correlational analysis, there was a cluster close to the right parahippocampal cortex, but located more inferior to the cluster of the median-split analysis, in the fusiform and cerebellum. Plot for the right fusiform cortex [30;-30;-26] (close to the parahippocampal cortex) without controlling for sex ( $r = 0.78$ ,  $p < 0.001$ ;  $r$  after controlling for sex = 0.85,  $p < 0.001$ ). (h) Dorsal anterior cingulate cortex [12;22;42]  $t = 3.65$ ; plot without controlling for sex ( $r = -0.65$ ,  $p = 0.003$ ;  $r$  after controlling for sex = -0.71,  $p = 0.002$ ).

In addition, a positive correlation between PRMQ and activity was found in the left occipital cortex [-42;-84;24]  $t = 6.59$ ,  $k = 192$ ; plot without controlling for sex ( $r = 0.81$ ,  $p < 0.001$ ;  $r$  after controlling for sex = 0.88,  $p < 0.001$ ). This correlation was driven by the outlier, however when computing the correlation without him,  $r = 0.66$ ,  $p = 0.004$  (and  $r = 0.67$ ,  $p = 0.005$  after controlling for sex). In the median-split analysis, this cluster appeared at  $p = 0.004$ ,  $t = 3.16$ ,  $k = 11$ , therefore it did not pass the threshold we set ( $p < 0.001$ ).

Correlations between PRMQ and cognitive performance: Only the correlation between PRMQ and binding was significant ( $r$  after controlling for sex = -0.57,  $p$  two-tailed = 0.03), replicating the behavioral results based on median-split presented in the manuscript.
